# Supplementary material
Source: PubMed Central journal article supplement (PMC6855282)
Supplement: Supp_Table1.pdf [file Supp_Table1.pdf]

## Supplementary Data

**Supplementary Table S1.** *Tested Levels of Pulsed Electric Field Parameters*

| <i>Level</i> | <i>Pulse length (<math>\mu</math>s)</i> | <i>Number of pulses</i> | <i>Pulse interval (ms)</i> |
|--------------|-----------------------------------------|-------------------------|----------------------------|
| 1            | 40                                      | 100                     | 350                        |
| 2            | 50                                      | 150                     | 400                        |
| 3            | 60                                      | 200                     | 450                        |
